# Supplementary material for: Nitrogen deposition does not affect the impact of shade on Quercus acutissima seedlings
Source: PLoS One. 2018 Mar 13;13(3):e0194261. doi: 10.1371/journal.pone.0194261 (PMC5849318; doi:10.1371/journal.pone.0194261)
Supplement: S1 Dataset — (XLSX) [file pone.0194261.s001.xlsx]

## Sheet: data
Plant traits of Q. acutissima
Light	Nitrogen deposition	Height (cm)	Basal Diameter (mm)	Leaf Number	Total Biomass (g)	LMR	SMR	RMR	R/S	Leaf N content(mg g-1)	PNUE (μmol mol-1 N s-1)	Chlorophyll a(mg g-1)	Chlorophyll b(mg g-1)	Carotenoids (mg g-1)	Total Chlorophyll (mg g-1)	Chlorophyll a/b	Amax (μmol m−2 s−1)	E (mmol m−2 s−1)	Gs (mmol m−2 s−1)	Soluble Sugar (mg g-1)	Starch (mg g-1)	Crude Fiber (g g-1)	Soluble Sugar ratio	Starch ratio	Crude Fiber ratio	Leaf Thickness (mm)	SLA (cm2 g-1)	LMA
L1	N0	24.5	3.62	16	5.89	0.24	0.12	0.64	1.76	1.53	0.97	3.77	1.95	0.49	5.71	1.93	4.19	2.66	103.11	24.01	29.22	150.23	0.12	0.14	0.74	0.57	254.27	39.3282
L1	N0	23	3.08	11	3.42	0.25	0.17	0.58	1.39	1.38	1.07	3.22	1.75	0.44	4.97	1.84	4.58	3.89	310.17	24.24	31.54	111.18	0.15	0.19	0.67	0.55	230.27	43.4281
L1	N0	17	2.55	10	3.43	0.3	0.12	0.58	1.4	1.28		0.74	0.4	0.13	1.14	1.83				30.87	34.86	145.52	0.15	0.17	0.69	0.8	181.42	55.1217
L1	N0	18	4.03	15	3.44	0.29	0.13	0.58	1.39	1.22	1.03	2.71	1.38	0.36	4.09	1.96	4.02	2.94	231.55	33.76	34.73	95.9	0.21	0.21	0.58	0.6	223.16	44.8113
L1	N0	17	3.75	13	3.96	0.27	0.16	0.57	1.31	1.36		3.66	1.97	0.43	5.63	1.86				22.11	31.66	103.78	0.14	0.2	0.66	0.5	267.86	37.3324
L1	N1	29	3.26	16	5.57	0.26	0.14	0.6	1.5	1.48	1.14	3.15	1.61	0.39	4.76	1.96	4.28	3.42	263.63	23.39	30.24	117.97	0.14	0.18	0.69	0.48	281.43	35.5329
L1	N1	13.5	2.71	7	2.96	0.27	0.11	0.62	1.64	1.13		3.74	1.89	0.46	5.63	1.98				31.6	42.45	162.44	0.13	0.18	0.69	0.79	192.08	52.0628
L1	N1	25	4.19	18	7.11	0.29	0.13	0.58	1.36	1.12	1.36	4.42	2.34	0.52	6.76	1.89	4.51	2.71	363.08	27.27	40.08	110.2	0.15	0.23	0.62	0.5	241.38	41.4278
L1	N1	24	3.29	15	4.33	0.31	0.14	0.55	1.2	1.38	1.13	4.78	1.68	0.89	6.46	2.84	5.14	3.82	304.12	32.36	50.87	136.07	0.15	0.23	0.62	0.53	217.53	45.9713
L1	N1	17	2.33	11	3.45	0.24	0.11	0.64	1.8	1.41		4.78	2.56	0.67	7.33	1.87				31.07	37.71	127.5	0.16	0.19	0.65	0.53	229.02	43.6644
L1	N2	27	4.46	25	7.88	0.29	0.21	0.5	0.99	1.4	1.64	3.86	1.76	0.53	5.62	2.19	4.6	3.92	207.69	21.4	24.59	80.62	0.17	0.19	0.64	0.42	357.23	27.9928
L1	N2	16	3.49	14	4.16	0.28	0.12	0.61	1.55	1.52	0.85	3.5	1.82	0.43	5.32	1.92	3.02	3.27	102.06	24.79	23.45	106.18	0.16	0.15	0.69	0.53	307.03	32.57
L1	N2	16	2.99	13	2.64	0.25	0.14	0.61	1.53	1.34		1.95	1.06	0.28	3.02	1.84				38.3	46.12	155.43	0.16	0.19	0.65	0.54	186.58	53.5953
L1	N2	15.5	4.22	12	3.78	0.24	0.13	0.63	1.68	1.18	1.99	1.56	0.84	2.67	2.4	1.87	6.96	4.38	308.19	28.99	33.03	73.73	0.21	0.24	0.54	0.75	241.41	41.424
L1	N2	22	3.06	14	2.09	0.32	0.18	0.5	1.01	1.47		3.24	1.77	0.36	5.01	1.83				18.99	32.14	64.08	0.16	0.28	0.56	0.48	290.24	34.454
L2	N0	31	3.7	21	12.6	0.16	0.09	0.75	2.95	1.44		1.34	0.6	0.19	1.94	2.22				40.11	85.66	118.17	0.16	0.35	0.48	0.8	198.02	50.501
L2	N0	32	3.74	25	11.79	0.21	0.12	0.67	2.07	0.95		2.12	0.89	0.3	3.01	2.37				37.08	45.86	144.02	0.16	0.2	0.63	0.7	193.02	51.8072
L2	N0	27	4.46	25	10.62	0.29	0.11	0.6	1.52	0.93	2.1	0.77	0.33	0.12	1.1	2.35	7.17	5.54	377.26	40.9	70.14	147.54	0.16	0.27	0.57	0.88	195.2	51.2291
L2	N0	30	4.47	22	14.5	0.24	0.1	0.66	1.9	1	1.42	1.23	0.53	0.19	1.77	2.32	5.75	4.54	544.23	48.41	111.77	150.12	0.16	0.36	0.48	0.62	175.86	56.8633
L2	N0	21.5	5.14	17	10.66	0.2	0.1	0.69	2.27	1.09	1.39	0.45	0.19	0.09	0.64	2.38	6.38	4.89	399.73	44.33	54.07	182.41	0.16	0.19	0.65	0.79	168.85	59.2242
L2	N1	41	5.76	26	14.02	0.31	0.17	0.52	1.1	1.02	1.55	1.18	0.54	0.11	1.73	2.17	6.87	5.37	611.02	43.54	129.24	109.41	0.15	0.46	0.39	0.88	164.52	60.7814
L2	N1	20.5	4.86	17	10.33	0.18	0.12	0.7	2.32	1.06	1.6	0.74	0.36	0.13	1.1	2.05	7.13	6.4	458.3	38.99	71.39	139.75	0.16	0.29	0.56	0.91	170.31	58.7165
L2	N1	26.5	4.08	24	12.81	0.19	0.1	0.72	2.51	1.3		1.59	0.67	0.22	2.26	2.39				45.55	66.16	169.99	0.16	0.23	0.6	0.79	164.71	60.7114
L2	N1	23.5	3.88	17	9.48	0.2	0.08	0.73	2.66	1.15	1.23	1.5	0.7	0.23	2.2	2.14	6.63	5.19	454.83	45.83	96.15	148.27	0.16	0.33	0.51	0.8	152.43	65.6055
L2	N1	23	4.57	27	6.25	0.29	0.18	0.53	1.15	1.3		0.98	0.41	0.16	1.39	2.38				41.66	52.06	222.37	0.13	0.16	0.7	0.84	175.38	57.0175
L2	N2	30.5	4.76	26	11.73	0.25	0.12	0.63	1.72	1.11	2.15	1.23	0.63	0.22	1.86	1.95	5.42	4.72	560.38	23.06	59.92	93.62	0.13	0.34	0.53	0.72	314.02	31.8452
L2	N2	27.5	5.05	32	12.17	0.25	0.1	0.65	1.89	1.11	1.69	1.89	0.75	0.25	2.63	2.53	6.42	6.12	591.09	34.31	66.19	176.88	0.12	0.24	0.64	0.75	209.18	47.8055
L2	N2	22.5	5.28	22	13.28	0.29	0.07	0.64	1.74	1.06		0.6	0.25	0.12	0.85	2.34				64.12	154.45	255.04	0.14	0.33	0.54	0.77	119.98	83.345
L2	N2	32	4.37	27	9.76	0.16	0.18	0.65	1.89	1.21	2.11	1.38	0.61	0.46	1.99	2.27	8.95	8.48	665.89	35.53	39.15	103.11	0.2	0.22	0.58	0.72	203.66	49.1012
L2	N2	23.5	3.41	11	6.24	0.16	0.12	0.72	2.54	1.48		1.53	0.7	0.26	2.23	2.18				80.62	105.76	247.75	0.19	0.24	0.57	0.9	90.41	110.602
